# Supplementary material for: Structural analysis of α-zirconium phosphate/cerium phosphate/graphene oxide nanocomposites with flame-retardant properties in polyvinyl alcohol
Source: Royal Society of Chemistry journal article supplement (doi:10.1039/c9nj06253j), 2020-01-01
Supplement: c9nj06253j1.pdf [file c9nj06253j1.pdf]

## Electronic Supplementary Information

### Structural analysis of $\alpha$ -zirconium phosphate/cerium phosphate/graphene oxide nanocomposites with the flame retardancy to polyvinyl alcohol

Qian Leng, Junyi Li, Yuhua Wang\*

Key Laboratory for Special Function Materials and Structure Design of the Ministry of the Education  
School of Physical Science and Technology, Lanzhou University, Lanzhou, 730000, P.R. China

\*Correspondence: Yuhua Wang, Fax:+86-931-8913554, E-mail: [wyh@lzu.edu.cn](mailto:wyh@lzu.edu.cn)

Journal to be published: New Journal of Chemistry

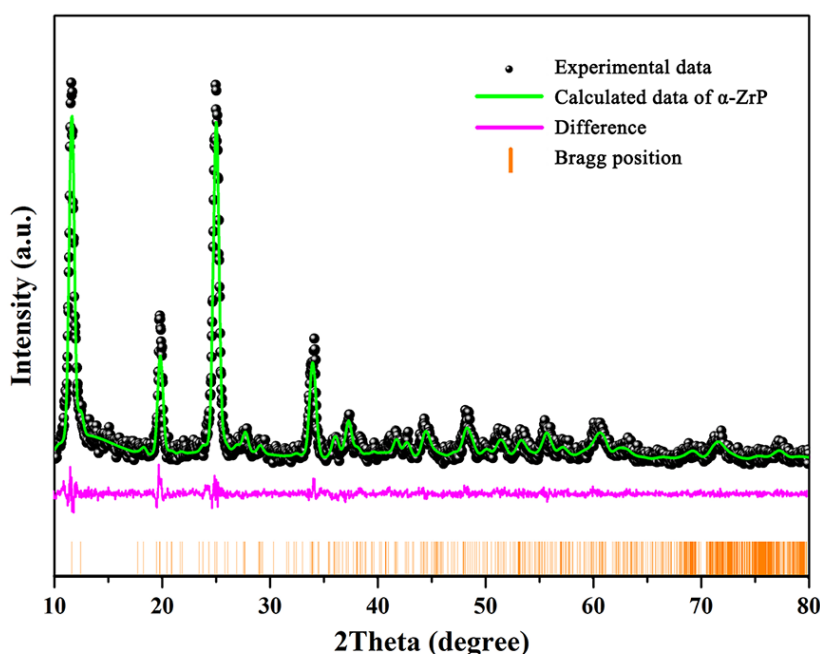

Figure. S1 The Rietveld refinement of pure  $\text{Zr}(\text{HPO}_4)_2 \cdot \text{H}_2\text{O}$ .

Table S1 Phase data of pure  $\text{Zr}(\text{HPO}_4)_2 \cdot \text{H}_2\text{O}$ .

| Formula sum     | $\text{Zr}(\text{HPO}_4)_2 \cdot \text{H}_2\text{O}(\alpha\text{-ZrP})$ |
|-----------------|-------------------------------------------------------------------------|
| Crystal system  | Monoclinic                                                              |
| Space-group     | P 1 21/n 1 (14)                                                         |
| Cell parameters | a=9.110(5) Å b=5.270(4) Å c=15.457(5) Å                                 |
| Cell ratio      | a/b=1.7287 b/c=0.3409 c/a=1.6967                                        |
| Cell volume     | 726.54(2) Å <sup>3</sup>                                                |
| R factor        | $R_{\text{wp}}=13.55\%$ , $R_p=10.70\%$ , $\chi^2=1.580$                |

**Table S2** Atomic parameters of pure  $\text{Zr}(\text{HPO}_4)_2 \cdot \text{H}_2\text{O}$ 

| Atom | Wyck. | Site | S.O.F. | x/a      | y/b      | z/c     |
|------|-------|------|--------|----------|----------|---------|
| Zr1  | 4e    | 1    | 1      | 0.24181  | 0.24483  | 0.49857 |
| P1   | 4e    | 1    | 1      | 0.35962  | 0.7426   | 0.38829 |
| P2   | 4e    | 1    | 1      | -0.1075  | 0.17011  | 0.42412 |
| O1   | 4e    | 1    | 1      | 0.55231  | 0.63097  | 0.46964 |
| O2   | 4e    | 1    | 1      | 0.34522  | 0.53595  | 0.37530 |
| O3   | 4e    | 1    | 1      | 0.26976  | 0.93807  | 0.39359 |
| O4   | 4e    | 1    | 1      | 0.28556  | 1.95303  | 0.38757 |
| O5   | 4e    | 1    | 1      | -0.15995 | 0.50362  | 0.39151 |
| O6   | 4e    | 1    | 1      | -0.18627 | 0.01178  | 0.44514 |
| O7   | 4e    | 1    | 1      | -0.15528 | 0.22693  | 0.29616 |
| O8   | 4e    | 1    | 1      | 0.03263  | 0.40281  | 0.39642 |
| O9   | 4e    | 1    | 1      | 0.03568  | 0.70240  | 0.26542 |
| H1   | 4e    | 1    | 1      | 0.27194  | -0.83556 | 0.16228 |
| H2   | 4e    | 1    | 1      | 1.32656  | 6.78193  | 0.52875 |
| H3   | 4e    | 1    | 1      | -0.11281 | 2.09937  | 0.31864 |
| H4   | 4e    | 1    | 1      | 0.98534  | 3.98886  | 0.64357 |

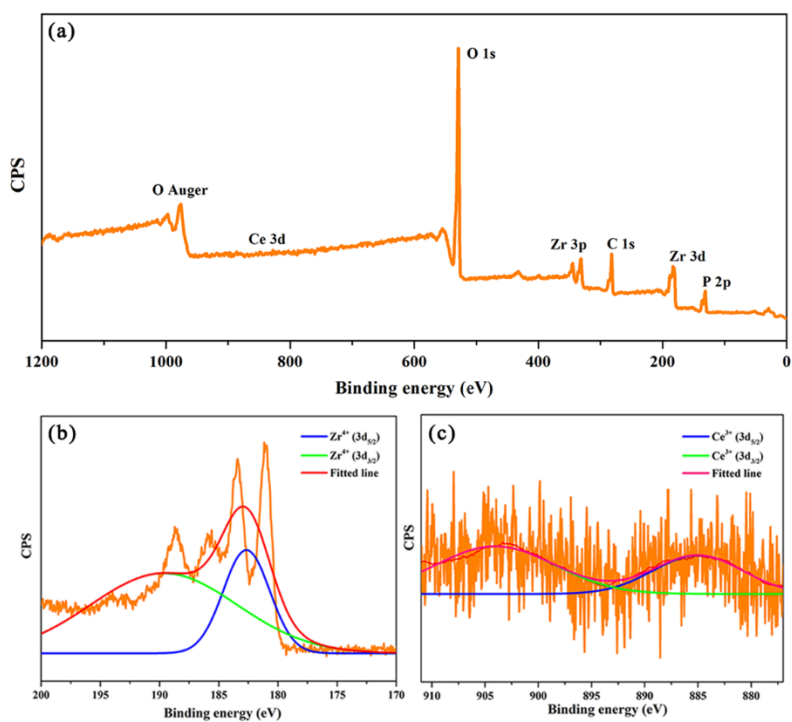**Figure. S2** (a) The full XPS spectrum of ZCG nanocomposites. (b) The fine XPS spectra of  $\text{Zr}^{4+}$ . (c) The fine XPS spectra of  $\text{Ce}^{3+}$ .

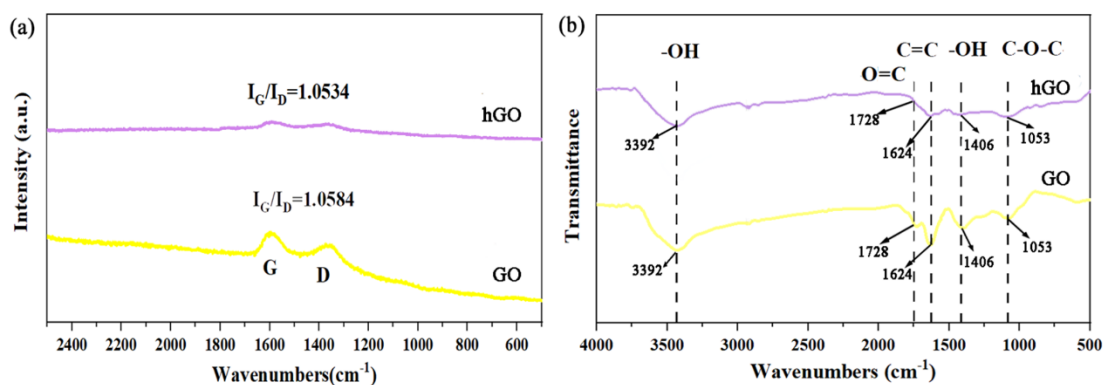

**Figure. S3** The Raman test(a) and Infrared analysis(b) of hGO and GO.

**Table S3** Micro calorimetry test data of Fig. 4(a)

| Samples               | PHRR(W/g) | T <sub>p</sub> (°C) | HRC(J/g-K) | THR(kJ/g) |
|-----------------------|-----------|---------------------|------------|-----------|
| 0.00 CeO <sub>2</sub> | 216.8     | 353.1               | 2186.1     | 22.6      |
| 0.05 CeO <sub>2</sub> | 154.0     | 355.1               | 1838.7     | 21.3      |
| 0.10 CeO <sub>2</sub> | 149.6     | 361.5               | 1121.9     | 20.2      |
| 0.15 CeO <sub>2</sub> | 148.1     | 373.8               | 1060.1     | 19.7      |
| 0.20 CeO <sub>2</sub> | 160.5     | 368.6               | 1951.3     | 20.0      |

**Table S4** Micro calorimetry test data of Fig. 4(b)

| Samples                | pHRR(W/g) | T <sub>p</sub> (°C) | HRC(J/g-K) | THR(kJ/g) |
|------------------------|-----------|---------------------|------------|-----------|
| Pure PVA               | 216.8     | 353.1               | 2186.1     | 22.6      |
| PVA/ $\alpha$ -ZrP     | 172.5     | 373.9               | 1356.6     | 19.3      |
| PVA/ $\alpha$ -ZrP/CPO | 145.5     | 374.2               | 518.5      | 18.9      |
| PVA/ZCG                | 137.4     | 363.4               | 1563.9     | 17.94     |

**Table S5** Micro calorimetry test data of Fig. 4(c)

| Samples     | pHRR(W/g) | T <sub>p</sub> (°C) | HRC(J/g-K) | THR(kJ/g) |
|-------------|-----------|---------------------|------------|-----------|
| Pure PVA    | 216.8     | 353.1               | 2186.1     | 22.6      |
| PVA/APP     | 134.1     | 442.                | 1144.6     | 21.1      |
| PVA/APP/ZCG | 115.2     | 461.3               | 1351.8     | 17.6      |

**Table S6** The data of T-50%, R<sub>max</sub>, and T<sub>max</sub> about PVA and its flame-retardant composites in TGA/DTG

| Samples                    | T - 50% (°C) | R <sub>max</sub> (%) | T <sub>max</sub> (°C) |
|----------------------------|--------------|----------------------|-----------------------|
| Pure PVA                   | 280.2        | 0.99                 | 262.5                 |
| PVA/APP                    | 287.1        | 0.86                 | 276.1                 |
| PVA/APP/ $\alpha$ -ZrP     | 290.3        | 0.79                 | 268.2                 |
| PVA/APP/ $\alpha$ -ZrP/CPO | 294.1        | 0.81                 | 259.5                 |
| PVA/APP/ZCG                | 404.9        | 0.76                 | 255.6                 |

Note. T - 50% was the temperature at which weight is reduced by 50%. R<sub>max</sub> was the absolute value of the maximum weight loss rate. T<sub>max</sub> was the maximum weight loss rate corresponding temperature of the composites.

**Table S7** The elongation at break and tensile strength of PVA matrix with ZCG and APP.

| Samples     | Tensile Strength(MPa) | Elongation at break(%) |
|-------------|-----------------------|------------------------|
| PVA         | 91.1                  | 5.1                    |
| PVA/APP     | 57.9                  | 4                      |
| PVA/ZCG     | 87.7                  | 4.2                    |
| PVA/APP/ZCG | 80.3                  | 3.8                    |

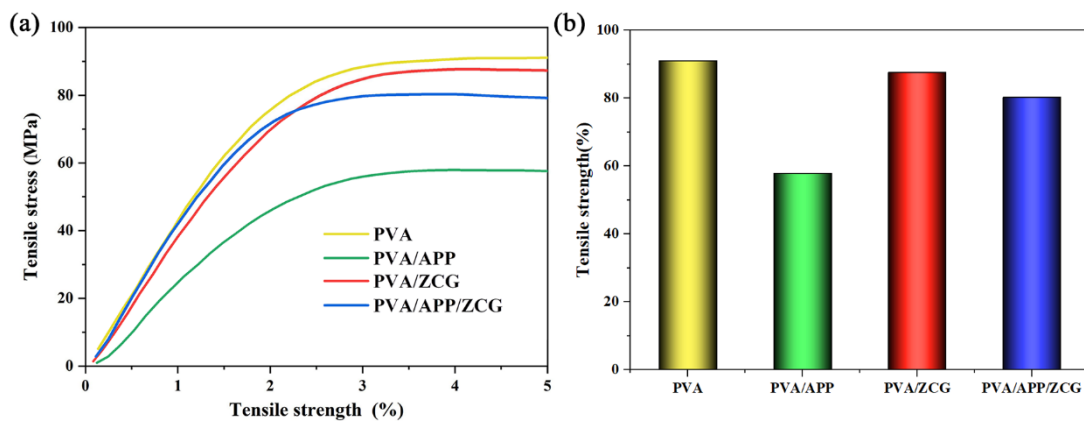

**Figure. S4** (a) The stress-strain diagrams of PVA and its composites. (b) The tensile strength value of PVA and its composites.

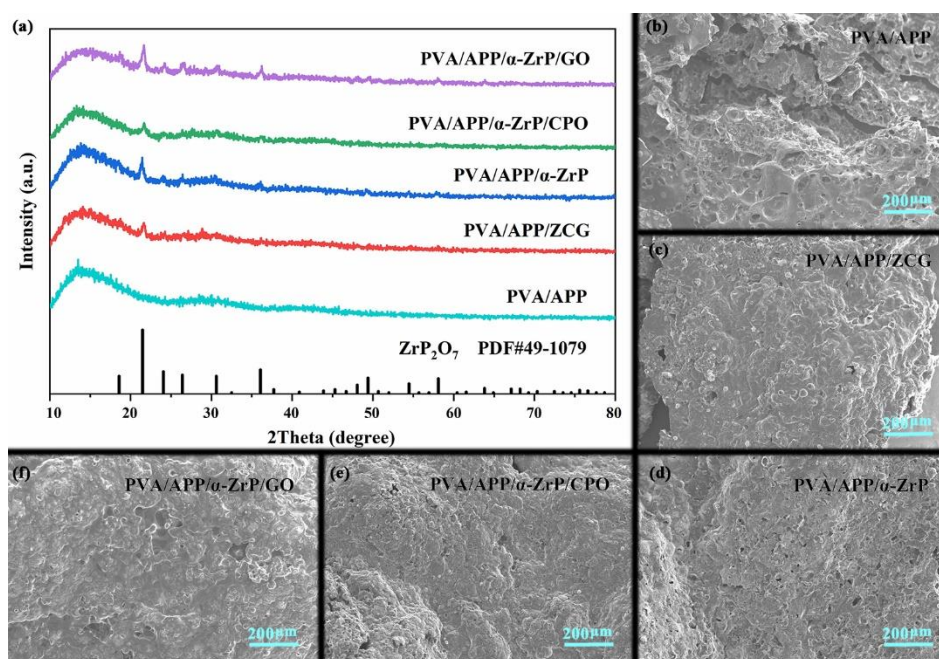

**Figure S5** The XRD patterns(a) and SEM images(b-f) of char residues of PVA/APP/ZCG samples.
