# Supplementary figures and images for: Structural analysis of α-zirconium phosphate/cerium phosphate/graphene oxide nanocomposites with flame-retardant properties in polyvinyl alcohol
Source: Royal Society of Chemistry journal article supplement (doi:10.1039/c9nj06253j), 2020-01-01

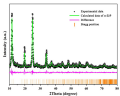

Supplement: c9nj06253j2.pdf [file c9nj06253j2.pdf]

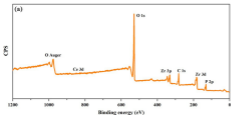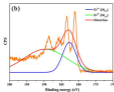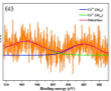

Supplement: c9nj06253j3.pdf [file c9nj06253j3.pdf]

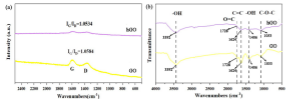

Supplement: c9nj06253j4.pdf [file c9nj06253j4.pdf]

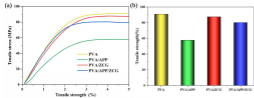

Supplement: c9nj06253j5.pdf [file c9nj06253j5.pdf]

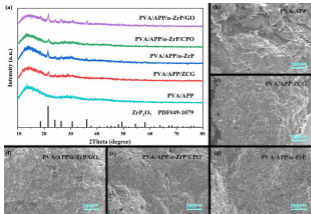

Supplement: c9nj06253j6.pdf [file c9nj06253j6.pdf]
